# Supplementary material for: Electro-oxidation of formic acid catalyzed by FePt nanoparticles
Source: Royal Society of Chemistry journal article supplement (doi:10.1039/b603045a), 2006-01-01

## Electro-oxidation of formic acid catalyzed by FePt nanoparticles

Wei Chen,<sup>†</sup> Jaemin Kim,<sup>‡</sup> Shouheng Sun,<sup>‡</sup> and Shaowei Chen<sup>†\*</sup>

### 1. TEM image of the FePt nanoparticles

TEM image of 3 nm Fe<sub>20</sub>Pt<sub>80</sub> nanoparticles. The sample was prepared by drying a hexane dispersion of the particles on an amorphous carbon-coated copper grid. The particles were imaged using a Philips TEM 420 (120 KV).

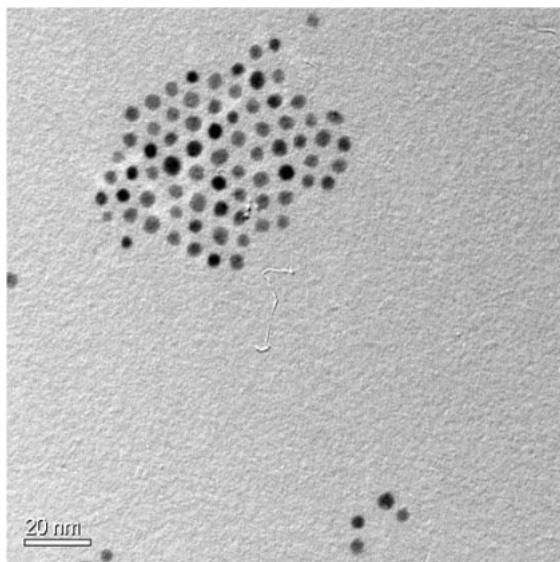

---

\* Corresponding author.  
Tel: 831-459-5841;  
Fax: 831-459-2935;  
E-mail: [schen@chemistry.ucsc.edu](mailto:schen@chemistry.ucsc.edu)

## 2. XRD Pattern of the FePt nanoparticles

X-ray diffraction pattern of the FePt nanoparticle assembly on a glass substrate. The pattern was collected on a Bruker AXS D8 Advance diffractometer under Cu  $K\alpha$  radiation ( $\lambda = 1.5405\text{\AA}$ ).

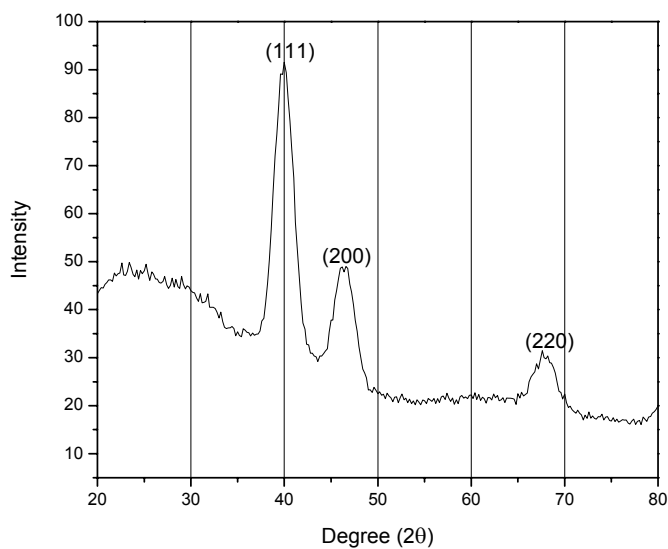

Supplement: b603045a.pdf [file b603045a.pdf]
